# Supplementary material for: The effect of ISO/IEC 27001 standard over open-source intelligence
Source: PeerJ journal article supplement (doi:10.7717/peerj-cs.810), 2022-01-06
Supplement: raw_data.zip [file raw_data.zip]

## Sheet: Sheet1
Q1	Q2	Q3	Q4	Q5	Q6	Q7	Q8	Q9	Q10	Q11	Q12	Q13	Q14
Honor degree	3-5years	Education	Consulting	Australia	Yes	Instegram		yes	no	no	Maltego, Netanalys,	yes	yes
Bachelor's degree	8-10 years	Finance	Corporate Investigator	Kenya	Very much	LinkedIn, Twitter, YouTube		yes	no	ys	IEF,Google Hacks, Maltego	yes	yes
Master's degree	10-12years	University	Forensic expert	South Africa	Extremely high	LinkedIn, Twitter, YouTube		yes	yes	yes	IEF, Google Hacks	yes	yes
Engineering degree	4-5years	Software agency	Consultant	New York	Neutral	LinkedIn		no	no	no	Python, Bulk	yes	yes
Diploma in computers.	6-8years	Government agency	Corporate investigator	Britain	Very comfortable	LinkedIn, Twitter		yes	yes	yes	IEF, Google Haks	yes	yes
Professional certification	3-5years	Consultant	Insurance	India	Neutral	Twitter		yes	no	no	Google Hacks,Maltego	yes	no
Diploma	6-8years	College	Computer expert	Singapore	High	LinkedIn		yes	no	no	IEF, Maltego	yes	yes
Bachelor's degree	4-5years	Information Technology	Forensic expert	USA	Pretty sure	LinkedIn, Twitter		yes	no	no	Netanalys, Python	no	no
Doctorate’s degree	9-12years	Law Enforcement	Cyber crime expert	Germany	Extremely high	LinkedIn, Instegram, GooglePlus		yes	yes	yes	IEF, Google Hacks, Python	yes	yes
